# Supplementary material for: Carbonic anhydrase seven bundles filamentous actin and regulates dendritic spine morphology and density
Source: PubMed Central journal article supplement — EMBO Rep. 2021 Mar 15;22(4):e50145. doi: 10.15252/embr.202050145 (PMC8025036; doi:10.15252/embr.202050145), 2021-03-15
Supplement: EMBR-22-e50145-s014.pdf [file EMBR-22-e50145-s014.pdf]

## Expanded View Figures

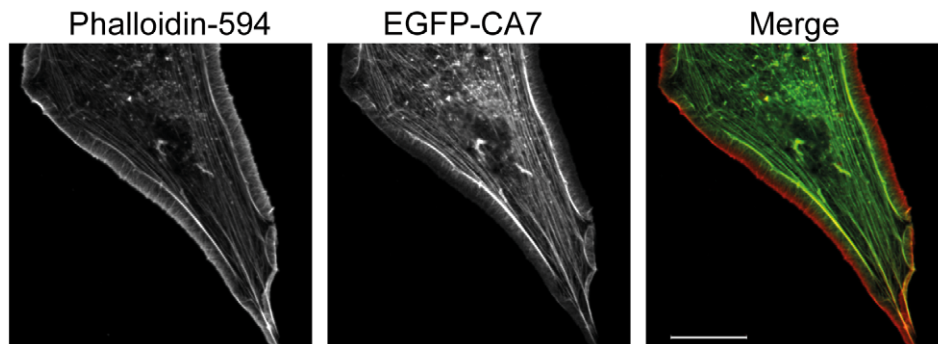

**Figure EV1. CA7 co-localizes with selective actin filaments.**

EGFP-CA7 co-localizes with subcellular F-actin structures (visualized with Phalloidin-594) except at the very edges of NIH3T3 fibroblast lamellipodia. Scale bar 20  $\mu\text{m}$ .

**Figure EV2. CA7 directly interacts with F-actin and enhances actin filament polymerization.**

- A, B Actin co-sedimentation assay was carried out at five different concentrations of  $\beta/\gamma$ -actin and with 1  $\mu\text{M}$  (A) CA7 or (B) CA2 at two different pH (7.4 or 6.5). After centrifugation, the supernatant (S) and pellet (P) fractions were separated and resolved by SDS-PAGE. Staining the gels with Coomassie Blue showed that CA7 co-sedimented in the pellets with actin, whereas CA2 was found only in the supernatant fraction. CA7; three repetitions and CA2; one repetition at each of the four actin concentrations/pH.
- C Analysis of the CA2 gels confirmed that the isoform does not interact with actin at either pH tested.
- D In the presence of mCA7, existing filaments assemble thus increasing elongation velocity in a stepwise manner. Fluorescence time-lapse images of F-actin bundling in the *in vitro* bundling assay. A mixture of unlabeled and Rhodamine labeled non-muscle actin was polymerized in the absence (PBS control, upper row) or in the presence of mCA7 (1.12  $\mu\text{M}$ , lower row). Numbers above images indicate the time after the onset of the experiment (images every 10 s) (First frame 200 s = 3 min 20 s, last frame 500 = 8 min 20 s). The filament/bundle ends that were followed over the experiment are indicated with white arrows. Intensity-based fire-coloring (Fiji) was used. Scale bar 5  $\mu\text{m}$ .
- E Quantification of the filament/bundle length for shown frames. Measured lengths were plotted to Excel  $x$  = time in seconds,  $y$  = length in  $\mu\text{m}$ .

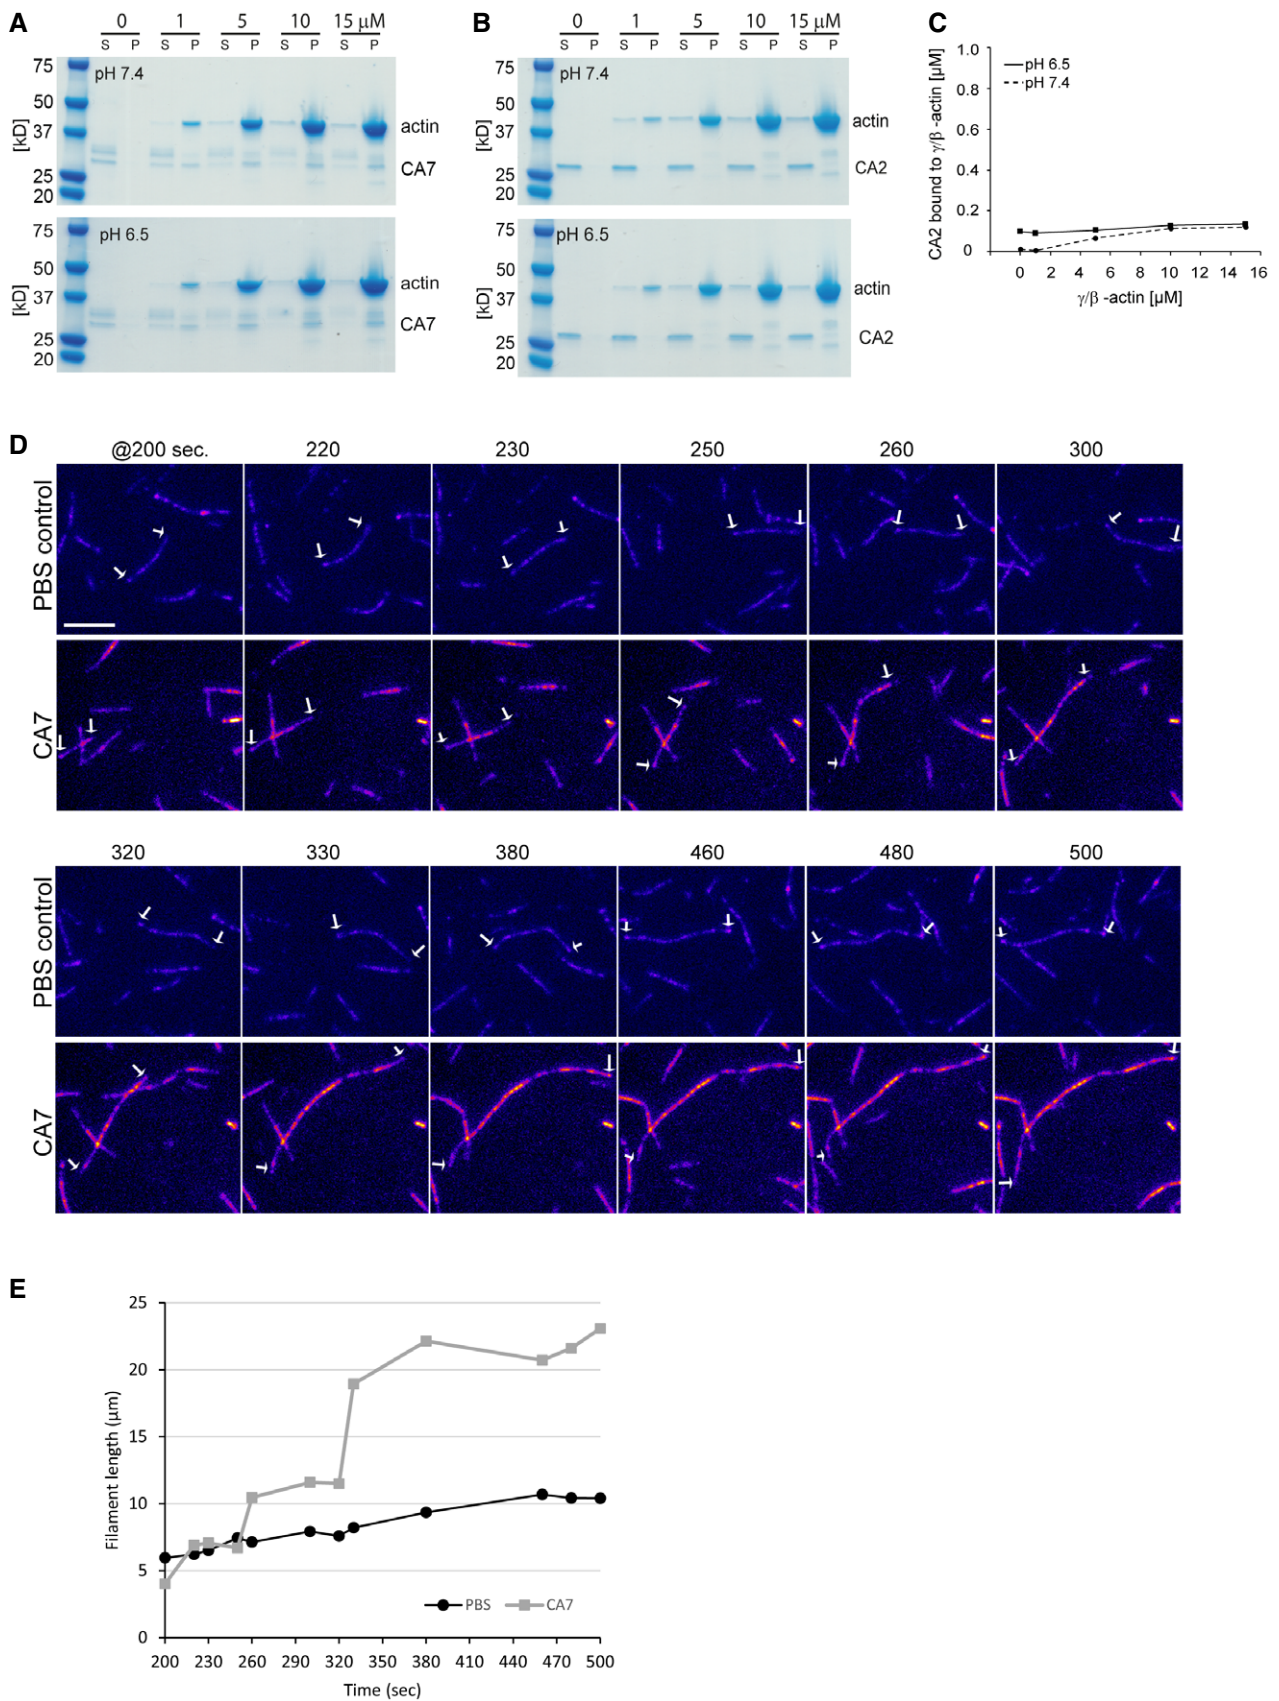

Figure EV2.

**Figure EV3. The identified actin interaction sites are unique to CA7 among human cytosolic CAs.**

Sequence alignment of the catalytically active (CA1, CA2, CA3, CA5A, CA5B, CA7, and CA13) and catalytically inactive (CA8 and CA10) human cytosolic CA protein sequences generated using the Clustal O (1.2.1) multiple sequence alignment. The amino acids that were characterized as part of a putative actin-binding site of CA7 (highlighted in red) are not conserved in the other cytosolic CA isoforms (highlighted in gray). An asterisk below the aligned sequences indicates fully conserved residues, a colon indicates residues with strongly similar properties (scoring > 0.5 in the Gonnet PAM 250 matrix) and a period indicates residues with weakly similar properties (scoring ≤ 0.5 in the Gonnet PAM 250 matrix).

|            |                                                                       |            |
|------------|-----------------------------------------------------------------------|------------|
| CA1        | -----MASPDWGYDDK-----N                                                | 12         |
| CA2        | -----MSHHWGYGKH-----N                                                 | 11         |
| CA3        | -----MAKEWGYASH-----N                                                 | 11         |
| CA5A       | MLGRNTWKTSAFSLVEQMWAPLWSRSMR-----PGRWCSQRSCAWQTSNN-----T              | 47         |
| CA5B       | MVVMNSLRVILQASPGKLLWRKFQIPRFM-----PARPCSLYTCTYKTRNR-----A             | 47         |
| <b>CA7</b> | ----- <b>MTGHHGWGYGQD</b> ----- <b>D</b>                              | <b>13</b>  |
| CA8        | -----ADLSFIE----DTVAFPEKE-----EDEEEEEEGVEWGYEEG-----                  | 33         |
| CA10       | -----MEIVWEVLFLLQANFIVCISAQQNSPKIHEGWWAYKEVVQGSFVP                    | 45         |
| CA13       | -----MSRLSWGYREH-----N                                                | 12         |
|            | : .                                                                   |            |
| CA1        | GPEQWSKLY----PIANGNNQSPVDIKTSETKHDTSLKPISVS--YNPATAKEIINVGH           | 66         |
| CA2        | GPEHWHKDF----PIAKGERQSPVDIDHTTAKYDPSLKLPLSVS--YDQATSLRILNNGHA         | 65         |
| CA3        | GPDHWHLELF----PNAKGENQSPVELHTKDIRHDPSPQLPWSVS--YDGGSAKTILNNGKT        | 65         |
| CA5A       | LHPLWTVPV----SVPGGTRQSPINIQWRDSVYDPQLKPLRVS--YEAASCLYIWNTGYL          | 101        |
| CA5B       | LHPLWESVD----LVPGGDRQSPINIRWRDSVYDPGLKPLTIS--YDPATCLHVWNNNGYS         | 101        |
| <b>CA7</b> | <b>GPSHWHKLY----PIAQGDRQSPINI ISSQAVYSPSLQPLELS--YEACMSLSITNNGHS</b>  | <b>67</b>  |
| CA8        | --VEWGLVF----PDANGEYQSPINLNSREARYDPSLDDVRLSPNYVVCRCDCVETNDGHT         | 87         |
| CA10       | VPSFWGLVNSAWNLCVSGKRQSPVNIETSHMIFDPFLTPLRINTGGR-KVSGTMYNTGRH          | 104        |
| CA13       | GPIHWKEFF----PIADGDQQSPIEIKTKEVKYDSSSLRPLSIK--YDPSSAKIISNSGHS         | 66         |
|            | * * * * * : : * * : : * *                                             |            |
| CA1        | FHVNFEEDNDRSVLKGPFSD--SYRLFQFHFWGSTNEHGSEHTVDGVKYS AELHVAHW           | 124        |
| CA2        | FNVEFDSDQDKAVLKGGLDGD--TYRLIQFHFWGSLDGGSEHTVDKKKYAAELHLVHW            | 123        |
| CA3        | CRVVFDDTYDRSMLRGGPLPG--PYRLRQFHLHWGSSDDHGSEHTVDGVKYS AELHLVHW         | 123        |
| CA5A       | FQVEFDDATEASGISGGPLEN--HYRLKQFHFWGAVNEGSEHTVDGHAYPAELHLVHW            | 159        |
| CA5B       | FLVEFEDSTDKSVIKGGPLEH--NYRLKQFHFWGAWIDAWGSEHTVDSKCFPAELHLVHW          | 159        |
| <b>CA7</b> | <b>VQVDFNDSDDRTVVTTGGPLEG--PYRLKQFHFWGKKHDV GSEHTVDGKSFPSSELHLVHW</b> | <b>125</b> |
| CA8        | IQVILK---SKSVLSGGPLPQGHEFELYEVRFHWGRENQRGSEHTVNFKAFPMELHLIHW          | 144        |
| CA10       | VSLRLD--KEHLVNISSGPMTY--SHRLEEIRLHFGSEDSQ GSEHLLNGQAFSGEVQLIHY        | 161        |
| CA13       | FNVDFFDDTENKSVLRGGPLTG--SYRLRQVHLHWGSADDDH GSEHIVDGVSYAAELHVVHW       | 124        |
|            | : : : * * * : : * * : : * * * : : * * : : * * : : *                   |            |
| CA1        | NSAKYSSLAEAASKADGLAVIGVLMKVGEANPKL-QKV--LDALQAIKTKGKRAFPTNFD          | 181        |
| CA2        | NT-KYGDFGKAVQQPDGLAVLGI FLKVGSAKPGK-LKV--VDVLDSIKTKGKSADFTNFD         | 179        |
| CA3        | NP-KYNTFKEALKQRDGI AVIGIFLKGIGHENGEF-QIF--LDALDKIKTKGKEAPFTKFD        | 179        |
| CA5A       | NSVKYQNYKEAVVGENGLAVIGVFLKLGHHQTL-QRL--VDILPEIKHKDARAAMPFD            | 216        |
| CA5B       | NAVRFENFEDAAL ENGLAVIGVFLKLGKHHKEL-QKL--VDTLPSIKHKDALVEFGSFD          | 216        |
| <b>CA7</b> | <b>NAKKYSTFGEAASAPDGLAVGVFLETGDEHPSM-NRL--TDALYMRFKGTKAQFSCFN</b>     | <b>182</b> |
| CA8        | NSTLFGSIDEAVGKPHGIAI IALFVQIGKEHVGL-KAV--TEILQDIQYKGSKTIPCFN          | 201        |
| CA10       | NHELYTNVTEAAKSPNGLVVVSI FIKVSDSSNPFLNRLNRDTITRITYKNDAYLLQGLN          | 221        |
| CA13       | NSDKYPSFVEAAHEPDGLAVLGVFLQIGEPNSQL-QKI--TDTLDSIKEKGKQTRFTNFD          | 181        |
|            | * : * * * * : : : : * : : *                                           |            |
| CA1        | PSTLLPS--SLDFWTPGSLTHPPLYESVTWII CKESISVSSEQLAQFRSLLSNVEGDNA          | 239        |
| CA2        | PRGLLE--SLDYWTPGSLTTPPLLECVTWIVLKEPISVSSEQVLKFRKLNFNNGEPEPE           | 237        |
| CA3        | PSCLFPA--CRDYWTYQGSFTTPPCEECIVWLLLKEPMTVSSDQMAKLRSLSSAENEP            | 237        |
| CA5A       | PSTLLPT--CWDYWTYAGSLTTPPLTESVTWIIQKEPVEVAPSQLSAFRTLLFSALGEE           | 274        |
| CA5B       | PSCLMPT--CPDYWTYSGSLTTPPLSESVTWI IKKQPVEVDHDQLEQFRTLLFTSEGEKE         | 274        |
| <b>CA7</b> | <b>PKCLLPA--SRHYWTPGSLTTPPLSESVTWIVLREPICISERQMGKFRSLLFTSEDDER</b>    | <b>240</b> |
| CA8        | PNTLLPDPLLRDYWVYEGSLTIPPCSEGVTWILFRYPLTISQLQIEEFRRLRTHVKGAEL          | 261        |
| CA10       | IEELYPE--TSSFITYDGSMTIPPCYETASWI IMNKPVYITRMQMHSRLLSQNQPSQIF          | 279        |
| CA13       | LLSLLPP--SWDYWTPGSLTTPPLLESVTWIVLQPINISSQQLAKFRSLLCTAEGEAA            | 239        |
|            | * * : * * * * * * * : : * : : * * * .                                 |            |
| CA1        | -----VEMQHNNRPTQPLKGRVTRASF-----                                      | 261        |
| CA2        | -----ELMVDNWRPAQPLKNRQIKASFK-----                                     | 260        |
| CA3        | -----VELVSNWRPPQPINNRRVTRASFK-----                                    | 260        |
| CA5A       | -----KMMVNNYRPLQPLMNRKVVASFQATNEGTRS-----                             | 305        |
| CA5B       | -----KRMVDNFRPLQPLMNRVTRSSFRHDYVNLNVQAKPKPATSQATP-----                | 317        |
| <b>CA7</b> | <b>-----IHMVNNFRPPQPLKGRVVKASFRA-----</b>                             | <b>264</b> |
| CA8        | VEGCDGILGDNFRPTQPLSDRVIRAAFQ-----                                     | 289        |
| CA10       | -----LSMSDNFRPVQPLNRCIRTNINFSLQKDCPNNRAQKLQYRVNEWLLK                  | 328        |
| CA13       | -----AELVSNHRPPQPLKGRVTRASFH-----                                     | 262        |
|            | : * * * * * : * : : :                                                 |            |

Figure EV3.

**Figure EV4. Subcellular localization and expression levels of the chimeric CA fusion proteins EGFP-CA7-mutant2, EGFP-CA2-revCA7, EGFP-CA7-R223E, and EGFP-CA7-H96/98C in fibroblasts.**

- A–G (A) Transfection with EGFP-CA7-mutant2 modified cellular F-actin structures in a similar manner than CA7. (B) Introduction of KKHDV and DDERIH motifs to CA2 (EGFP-CA2-revCA7) did not affect the diffuse cytosolic localization of the isoform 2. (C) EGFP-CA7-R223E and (D) the catalytically loss-of-function mutant EGFP-CA7-H96/98C co-localized with F-actin. F-actin is visualized with Phalloidin-594 in (A–D). The normalized fluorescence emission intensity profiles of (E) EGFP-CA2-revCA7 (F) EGFP-CA7-R223E, and (G) EGFP-CA7-H96/98C (black lines) and F-actin (red line). The yellow line in (B–D) indicates the cross-section of the cell from which the pixel intensities were measured. Analysis of co-localization is shown in lower panels of (E–G). Representative single-cell pixel intensities of EGFP and phalloidin-594 channels were plotted against each other and the Pearson's correlation coefficient value ( $r$ ) was calculated.  $n = 3–4$  independent transfections/construct. Scale bars in (A–D) is 20  $\mu\text{m}$ .
- H A representative Western blot showing the expression levels of EGFP-CA fusion proteins in 10  $\mu\text{g}$  of lysate collected 24 h after transfection. The EGFP-tagged CA fusion proteins are visible at approximately 60 kDa, and the  $\beta$ -actin loading control is visible at 42 kDa.
- I Quantification of the fusion proteins expression levels in NIH3T3 cells. Expression level of EGFP-CA7 was set at 1 for each Western blot.  $n = 5$  independent transfections for all fusion proteins except for CA7-mutant2, for which  $n = 4$  (data passed Shapiro–Wilk test for normality). Transfections' efficacy of different mutant fusion proteins was compared to CA7 WT using one-way ANOVA with Dunnett's multiple comparisons test. Data are given as mean + SEM.

Source data are available online for this figure.

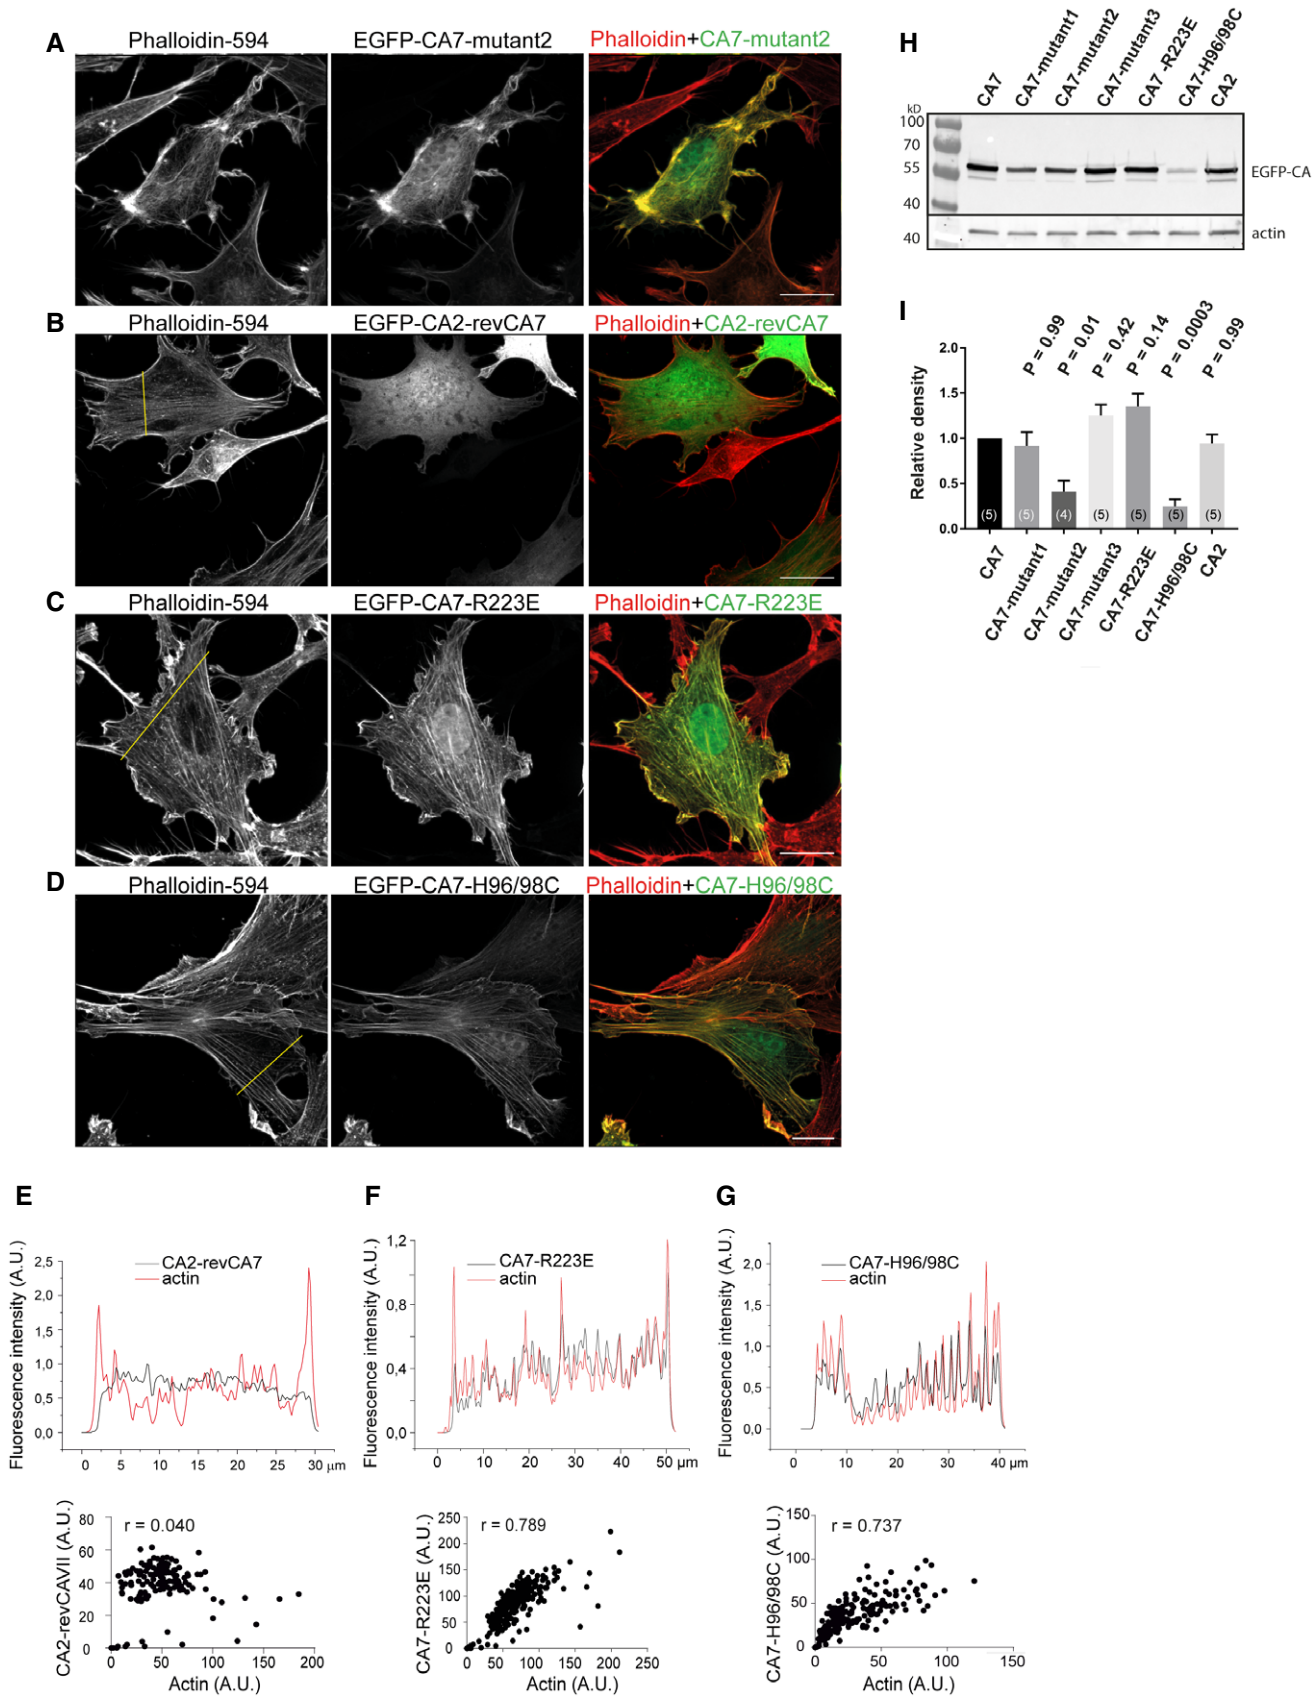

Figure EV4.

**Figure EV5. Localization of WT and chimeric CA EGFP-fusion proteins and their effect on dendritic spines in cultured hippocampal neurons.**

A–H (A) Control experiment with neurons co-expressing mCherry-actin and EGFP. (B) Neuron transfected with mCherry-actin and EGFP-CA2. Compared to the spine-targeted mCherry-actin, CA2 localizes more diffusely along dendritic shafts and spines. Both (C) EGFP-CA7 and (D) EGFP-CA7-mutant2 show a highly overlapping localization with mCherry-actin and disruption of dendritic spine morphology. Spines were replaced by thick, filopodia-like dendritic protrusions, which lack spine heads. The loss-of-function constructs (E) EGFP-CA7-mutant3 and (F) EGFP-CA7-mutant1 are more homogeneously present in both dendrites and spines. (G) EGFP-CA7-R223E and (H) the catalytically inactive EGFP-CA7-H96/98C showed overlapping localization with mCherry-actin. Scale bar 5  $\mu\text{m}$  (A–C, G, H), 10  $\mu\text{m}$  (D–F).

I EGFP-CA7 expression disrupted normal spine morphology in cultured neurons. Control, only mCherry-actin: spines with head  $0.34 \pm 0.04$ , thin spines/filopodia  $0.21 \pm 0.02$ , abnormal spines  $0.00 \pm 0.00$ , total  $0.54 \pm 0.05$  spines/ $\mu\text{m}$ ;  $n = 10$  cells, 509 spines, 973  $\mu\text{m}$  analyzed dendrite. EGFP-CA2: spines with head  $0.35 \pm 0.04$ , thin spines/filopodia  $0.17 \pm 0.02$ , abnormal spines  $0.00 \pm 0.00$ , total  $0.53 \pm 0.06$  spines/ $\mu\text{m}$ ;  $n = 10$  cells, 535 spines, 992  $\mu\text{m}$  analyzed dendrite; EGFP-CA7: spines with head  $0.05 \pm 0.02$ , thin spines/filopodia  $0.10 \pm 0.02$ , abnormal spines  $0.34 \pm 0.03$ , total  $0.49 \pm 0.05$  spines/ $\mu\text{m}$ ;  $n = 10$  cells, 493 spines, 10,256  $\mu\text{m}$  dendrite. Analyzed cells were pooled from two independent experiments. The bar diagrams show the mean.

Source data are available online for this figure.

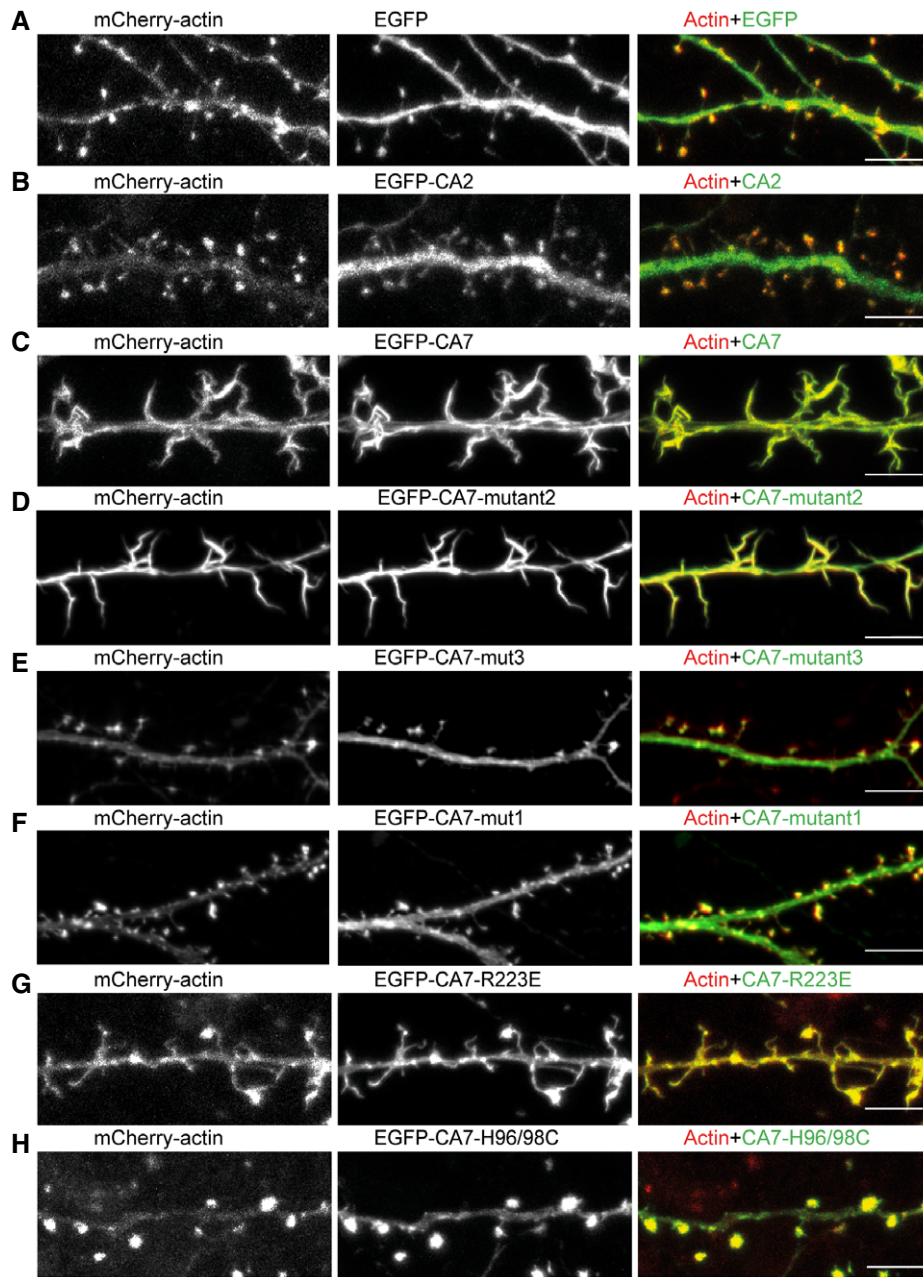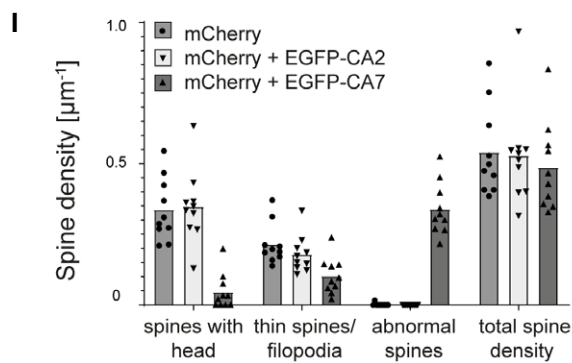

Figure EV5.
